# Supplementary material for: Unique assembly of low-dimensional viologen iodoplumbates and their improved semiconducting properties
Source: Royal Society of Chemistry journal article supplement (doi:10.1039/c0dt00757a), 2010-01-01
Supplement: c0dt00757a.pdf [file c0dt00757a.pdf]

## Supplementary Information

### **Unique assembly of low-dimensional viologen iodoplumbates and their improved semiconducting properties**

Yang Chen,<sup>ab</sup> Zi-Ou Wang,<sup>c</sup> Zhou Yang,<sup>a</sup> Zhi-Gang Ren,<sup>a</sup> Hong-Xi Li,<sup>a</sup> and Jian-Ping Lang<sup>\*ab</sup>

<sup>a</sup>*College of Chemistry, Chemical Engineering and Materials Science, Suzhou University, Suzhou 215123, Jiangsu, P. R. China*

<sup>b</sup>*State Key Laboratory of Organometallic Chemistry, Shanghai Institute of Organic Chemistry, Chinese Academy of Sciences, Shanghai 200032, P. R. China*

<sup>c</sup>*College of Electronics and Information Engineering, Suzhou University, 1 ShiZi Street, Suzhou 215006, Jiangsu, P. R. China*

## Table of Contents

|                                                                                                                                                                                                                                                                                                                                                                                                                                                                                                                                 |     |
|---------------------------------------------------------------------------------------------------------------------------------------------------------------------------------------------------------------------------------------------------------------------------------------------------------------------------------------------------------------------------------------------------------------------------------------------------------------------------------------------------------------------------------|-----|
| <b>Experimental Section</b> .....                                                                                                                                                                                                                                                                                                                                                                                                                                                                                               | S3  |
| <b>X-ray diffraction crystallography</b> .....                                                                                                                                                                                                                                                                                                                                                                                                                                                                                  | S4  |
| <b>Table S1.</b> Selected bond lengths (Å) and angles (°) for <b>1</b> and <b>2</b> .....                                                                                                                                                                                                                                                                                                                                                                                                                                       | S5  |
| <b>Scheme S1.</b> The possible mechanism for the formation of 1,1'-dibenzyl-4,4'-bipyridinium (BV <sup>2+</sup> ), 1,2,1'-tribenzyl-4,4'-bipyridinium (B'V), and two low-dimensional viologen iodoplumbates ([Pb <sub>13</sub> I <sub>38</sub> ][B'V] <sub>6</sub> ( <b>1</b> ), [(Pb <sub>5</sub> I <sub>14</sub> )(BV) <sub>2</sub> ] <sub>n</sub> ( <b>2</b> )) through solvothermal reactions of benzyl alcohol with 4,4'-bipy, PbI <sub>2</sub> and I <sub>2</sub> along with a trace amount of water in acetonitrile..... | S7  |
| <b>Figure S1.</b> View of the [Pb <sub>6</sub> I <sub>19</sub> ] fragment in the [Pb <sub>13</sub> I <sub>38</sub> ] <sup>12-</sup> anion of <b>1</b> with a labeling scheme and 50% thermal ellipsoids.....                                                                                                                                                                                                                                                                                                                    | S8  |
| <b>Figure S2.</b> View of the [Pb <sub>13</sub> I <sub>38</sub> ] <sup>12-</sup> anion in <b>1</b> .....                                                                                                                                                                                                                                                                                                                                                                                                                        | S8  |
| <b>Figure S3.</b> View of a Kagomé-like cavity of the molecular structure of <b>1</b> looking down along the <i>c</i> axis.....                                                                                                                                                                                                                                                                                                                                                                                                 | S8  |
| <b>Figure S4.</b> View of the double stranded iodoplumbate chain of <b>2</b> .....                                                                                                                                                                                                                                                                                                                                                                                                                                              | S9  |
| <b>Figure S5.</b> Views of the 3D packing diagram of compounds <b>1</b> (a) and <b>2</b> (b) looking down along the <i>c</i> -direction.....                                                                                                                                                                                                                                                                                                                                                                                    | S9  |
| <b>Figure S6.</b> Solid-state optical diffuse-reflection spectra of <b>1</b> , <b>2</b> along with two Zn/Cl-doped samples ( <b>2a</b> and <b>2b</b> ).....                                                                                                                                                                                                                                                                                                                                                                     | S10 |
| <b>Figure S7.</b> The flowing directions of current in the single crystals of <b>1</b> , <b>2</b> along with two Zn/Cl-doped samples ( <b>2a</b> and <b>2b</b> ).....                                                                                                                                                                                                                                                                                                                                                           | S11 |
| <b>Figure S8.</b> Powder X-ray diffraction (PXRD) spectra of <b>1</b> , <b>2</b> along with two Zn/Cl-doped samples ( <b>2a</b> and <b>2b</b> ).....                                                                                                                                                                                                                                                                                                                                                                            | S12 |
| <b>Figure S9.</b> The plot of 1/ <i>T</i> and Ln( $\sigma(kT/q)^{3/2}$ ) based on Holstein model for <b>1</b> , <b>2</b> , <b>2a</b> and <b>2b</b> .....                                                                                                                                                                                                                                                                                                                                                                        | S13 |

## Experimental Section

**General procedures.** All chemicals and reagents were obtained from commercial sources and used as received. The elemental analyses for C, H and N were performed on a Carlo–Erba CHNO–S microanalyzer. The IR spectra were recorded on a Varian 1000 FT–IR spectrometer as KBr disks ( $4000\text{--}400\text{ cm}^{-1}$ ).  $^1\text{H}$  NMR spectra were recorded at ambient temperature on a Varian UNITYplus-400 spectrometer.  $^1\text{H}$  NMR chemical shifts were referenced to the solvent signal in  $d_6$ -DMSO. PXRD were performed using a PANalytical X'Pert PRO MPD system (PW3040/60).

Syntheses of  $(\text{Pb}_{13}\text{I}_{38})(\text{B}'\text{V})_6$  (**1**) and  $[(\text{Pb}_5\text{I}_{14})(\text{BV})_2]_n$  (**2**): To a Pyrex glass tube (15 cm in length, 7 mm in inner diameter) was added  $\text{PbI}_2$  (23 mg, 0.05 mmol), iodine (13 mg, 0.05 mmol), 4,4'-bipy (8 mg, 0.05 mmol), benzyl alcohol (0.5 mL), water ( $3.0\text{ }\mu\text{L}$ ) and acetonitrile (1.5 mL). The tube was sealed and heated in an oven at  $150\text{ }^\circ\text{C}$  for 35 h and then cooled to room temperature at a rate of  $5\text{ }^\circ\text{C}/100\text{ min}$  to form red cube crystals of **1** and red rod crystals of **2**, which were collected manually under microscope, washed with ethyl acetate, and dried in air. Yield for **1**: 13 mg (34 % based on  $\text{PbI}_2$ ). Anal. Calcd for  $\text{C}_{186}\text{H}_{168}\text{N}_{12}\text{Pb}_{13}\text{I}_{38}$ : C, 22.15; H, 1.68; N, 1.67 %. Found: C, 22.47; H, 1.68; N, 1.55 %. IR (KBr,  $\text{cm}^{-1}$ ): 3036m, 2931w, 1631s, 1552m, 1523w, 1494m, 1454s, 1423m, 1385m, 1353w, 1341w, 1278w, 1207w, 1187w, 1157m, 1078w, 1028w, 1002w, 971w, 923w, 895w, 839w, 810m, 764w, 737s, 697s, 651w, 624m, 597w, 555w, 517w, 463w.  $^1\text{H}$  NMR (300 MHz,  $d_6$ -DMSO, 298 K, TMS):  $\delta$  = 4.63 (s, 2H,  $-\text{CH}_2-$ ), 5.94 (d, 4H,  $-\text{CH}_2-$ ), 7.35 (m, 15H, Ph-H), 8.62 (m, 4H, Py-H), 9.27 (d, 1H, Py-H), 9.44 (d, 2H, Py-H). Yield for **2**: 11 mg (30 % based on  $\text{PbI}_2$ ). Anal. Calcd for  $\text{C}_{48}\text{H}_{44}\text{N}_4\text{Pb}_5\text{I}_{14}$ : C, 16.52; H, 1.27; N, 1.61 %. Found: C, 16.44; H, 1.25; N, 1.53 %. IR (KBr,  $\text{cm}^{-1}$ ): 3106w, 3089w, 3040m, 2955w, 2930w, 1632s, 1554m, 1494m, 1440s, 1384w, 1343m, 1277w, 1208m, 1157m, 1027w, 964w, 838w, 803m, 742m, 698m, 626w, 593w, 557w, 502w, 453w.  $^1\text{H}$  NMR (300 MHz,  $d_6$ -DMSO, 298 K, TMS):  $\delta$  = 5.94 (s, 4H,  $-\text{CH}_2-$ ), 7.54 (q, 10H, Ph-H), 8.74 (d, 4H, Py-H), 9.51 (d, 4H, Py-H). Pure **2** could also be prepared as above using 0.5 mL water and 1.0 mL MeCN. Yield: 17 mg (47 % based on  $\text{PbI}_2$ ).

Preparation of **2a**: To 0.1 M  $\text{ZnCl}_2$  aqueous solution (8.0 mL) was added crystals of **2** (80 mg,

0.023 mmol). The mixture was sealed and kept it at room temperature for two weeks. The resulting crystals (**2a**) was washed with a large amount of deionized water ten times and dried in air.

Preparation of **2b**: To a Pyrex glass tube (15 cm in length, 7 mm in inner diameter) was added crystals of **2** (20 mg, 0.006 mmol) and 0.1 M ZnCl<sub>2</sub> aqueous solution (2.0 mL). The tube was sealed and heated in an oven at 80 °C for 12 h and then cooled to room temperature directly. The resulting crystals (**2b**) was washed with a large amount of deionized water ten times and dried in air.

**X-ray diffraction crystallography:** X-ray single-crystal diffraction data for **1** and **2** were collected on a Rigaku Mercury CCD diffractometer by using graphite monochromated Mo-K $\alpha$  ( $\lambda$  = 0.71073 Å). Cell parameters were refined by using the program *CrystalClear* (Rigaku and MSC, version 1.3, 2001). The collected data were reduced by using the program *CrystalClear*, and an absorption correction (multiscan) was applied. The reflection data were also corrected for Lorentz and polarization effects. The crystal structures of **1** and **2** were solved by direct methods and refined on  $F^2$  by full-matrix least-squares methods with the *SHELXL-97* program.<sup>1</sup> For **1**, one benzyl group in B'V<sup>2+</sup> was disordered over two positions, which were isotropically refined with an occupancy factor of 0.50/0.50 for C19~C24/C19'~C24'. All non-hydrogen atoms were refined anisotropically. All H atoms were introduced at the calculated positions and included in the structure-factor calculations. All the calculations were performed on a Dell workstation using the *CrystalStructure* crystallographic software package (Rigaku and MSC, Ver.3.60, 2004).

<sup>1</sup> G. M. Sheldrick, *SHELXS-97 and SHELXL-97. Program for the refinement of crystal structures*, University of Göttingen, Germany, 1997.

**Table S1.** Selected bond lengths (Å) and angles (°) for **1** and **2**

| Complex 1         |            |                  |            |
|-------------------|------------|------------------|------------|
| Pb(1)-I(1)        | 3.2250(8)  | Pb(2)-I(1)       | 3.3420(9)  |
| Pb(2)-I(2)        | 3.1030(10) | Pb(2)-I(3)       | 3.0230(10) |
| Pb(2)-I(4)        | 3.1482(10) | Pb(2)-I(1A)      | 3.4295(9)  |
| Pb(2)-I(7)        | 3.450(10)  | Pb(3)-I(2)       | 3.2292(10) |
| Pb(3)-I(4A)       | 3.492(12)  | Pb(3)-I(5)       | 2.9874(12) |
| Pb(3)-I(6)        | 3.1371(11) | Pb(3)-I(6A)      | 3.2471(11) |
| Pb(3)-I(7)        | 3.517(12)  |                  |            |
| I(1)-Pb(1)-I(1A)  | 90.29(2)   | I(2)-Pb(2)-I(3)  | 88.63(3)   |
| I(3)-Pb(2)-I(4)   | 94.15(3)   | I(2)-Pb(2)-I(4)  | 93.39(3)   |
| I(1)-Pb(2)-I(3)   | 96.98(3)   | I(1)-Pb(2)-I(2)  | 172.62(3)  |
| I(1)-Pb(2)-I(4)   | 90.99(2)   | I(3)-Pb(2)-I(1A) | 91.66(2)   |
| I(2)-Pb(2)-I(1A)  | 90.13(2)   | I(4)-Pb(2)-I(1A) | 173.27(3)  |
| I(1)-Pb(2)-I(1A)  | 84.94(3)   | I(3)-Pb(2)-I(7)  | 175.01(3)  |
| I(7)-Pb(2)-I(1A)  | 85.59(3)   | I(1)-Pb(2)-I(7)  | 86.93(3)   |
| I(2)-Pb(2)-I(7)   | 87.22(3)   | I(4)-Pb(2)-I(7)  | 88.85(3)   |
| I(5)-Pb(3)-I(6)   | 92.97(4)   | I(2)-Pb(3)-I(5)  | 88.32(4)   |
| I(2)-Pb(3)-I(6)   | 94.32(3)   | I(5)-Pb(3)-I(6A) | 102.17(4)  |
| I(6)-Pb(3)-I(6A)  | 90.20(4)   | I(2)-Pb(3)-I(6A) | 168.37(3)  |
| I(2)-Pb(3)-I(4A)  | 86.31(4)   | I(5)-Pb(3)-I(4A) | 97.57(4)   |
| I(4A)-Pb(3)-I(6A) | 87.31(4)   | I(6)-Pb(3)-I(4A) | 169.45(4)  |
| I(7)-Pb(3)-I(4A)  | 82.52(4)   | I(2)-Pb(3)-I(7)  | 84.15(4)   |
| I(5)-Pb(3)-I(7)   | 172.45(4)  | I(7)-Pb(3)-I(6A) | 85.38(4)   |
| I(6)-Pb(3)-I(7)   | 87.07(4)   |                  |            |
| Complex 2         |            |                  |            |
| Pb(1)-I(1)        | 3.2288(11) | Pb(1)-I(2)       | 3.1770(12) |
| Pb(1)-I(3)        | 3.3154(11) | Pb(2)-I(1B)      | 3.2218(11) |
| Pb(2)-I(2A)       | 3.2285(11) | Pb(2)-I(3)       | 3.3635(11) |

|                   |            |                  |            |
|-------------------|------------|------------------|------------|
| Pb(2)-I(3B)       | 3.4790(12) | Pb(2)-I(4)       | 3.1447(12) |
| Pb(2)-I(5)        | 3.0561(11) | Pb(3)-I(1A)      | 3.6130(13) |
| Pb(3)-I(3)        | 3.6780(13) | Pb(3)-I(4C)      | 3.2785(11) |
| Pb(3)-I(5)        | 3.1964(11) | Pb(3)-I(6)       | 2.9810(12) |
| Pb(3)-I(7)        | 3.0047(13) |                  |            |
| I(1)-Pb(1)-I(2)   | 86.31(3)   | I(1)-Pb(1)-I(1A) | 178.53(4)  |
| I(1)-Pb(1)-I(2A)  | 92.65(3)   | I(1)-Pb(1)-I(3)  | 86.61(3)   |
| I(1)-Pb(1)-I(3A)  | 94.48(3)   | I(2)-Pb(1)-I(2A) | 90.95(4)   |
| I(2)-Pb(1)-I(3)   | 172.30(2)  | I(2)-Pb(1)-I(3A) | 92.39(3)   |
| I(3)-Pb(1)-I(3A)  | 85.16(4)   | I(4)-Pb(2)-I(5)  | 86.20(4)   |
| I(5)-Pb(2)-I(1B)  | 89.07(3)   | I(4)-Pb(2)-I(1B) | 94.69(3)   |
| I(5)-Pb(2)-I(2A)  | 92.47(3)   | I(4)-Pb(2)-I(2A) | 87.00(3)   |
| I(1B)-Pb(2)-I(2A) | 177.79(3)  | I(3)-Pb(2)-I(5)  | 85.81(3)   |
| I(3)-Pb(2)-I(4)   | 171.55(3)  | I(3)-Pb(2)-I(1B) | 87.92(3)   |
| I(3)-Pb(2)-I(2A)  | 90.60(3)   | I(1B)-Pb2-I(3B)  | 84.02(4)   |
| I(2A)-Pb2-I(3B)   | 94.39(4)   | I(3)-Pb2-I(3B)   | 91.93(4)   |
| I(4)-Pb2-I(3B)    | 96.32(4)   | I(5)-Pb2-I(3B)   | 172.81(4)  |
| I(3)-Pb(3)-I(1A)  | 82.45(4)   | I(3)-Pb(3)-I(4C) | 102.30(4)  |
| I(3)-Pb(3)-I(5)   | 78.75(4)   | I(3)-Pb(3)-I(6)  | 96.71(4)   |
| I(3)-Pb(3)-I(7)   | 164.59(4)  | I(5)-Pb(3)-I(6)  | 94.47(3)   |
| I(5)-Pb(3)-I(7)   | 86.25(4)   | I(5)-Pb(3)-I(1A) | 99.25(4)   |
| I(5)-Pb(3)-I(4C)  | 174.40(3)  | I(6)-Pb(3)-I(1A) | 175.96(4)  |
| I(6)-Pb(3)-I(4C)  | 90.87(3)   | I(6)-Pb(3)-I(7)  | 87.85(4)   |
| I(7)-Pb(3)-I(1A)  | 93.98(4)   | I(7)-Pb(3)-I(4C) | 92.30(4)   |
| I(1A)-Pb(3)-I(4C) | 85.46(4)   |                  |            |

---

Symmetry codes: for **1**: A:  $-x + y + 1, -x + 1, z$ ; for **2**: A:  $-x, y, 1/2 - z$ ; B:  $-x, 1 - y, 1 - z$ ; C:  $x, 1 - y, z - 1/2$ .

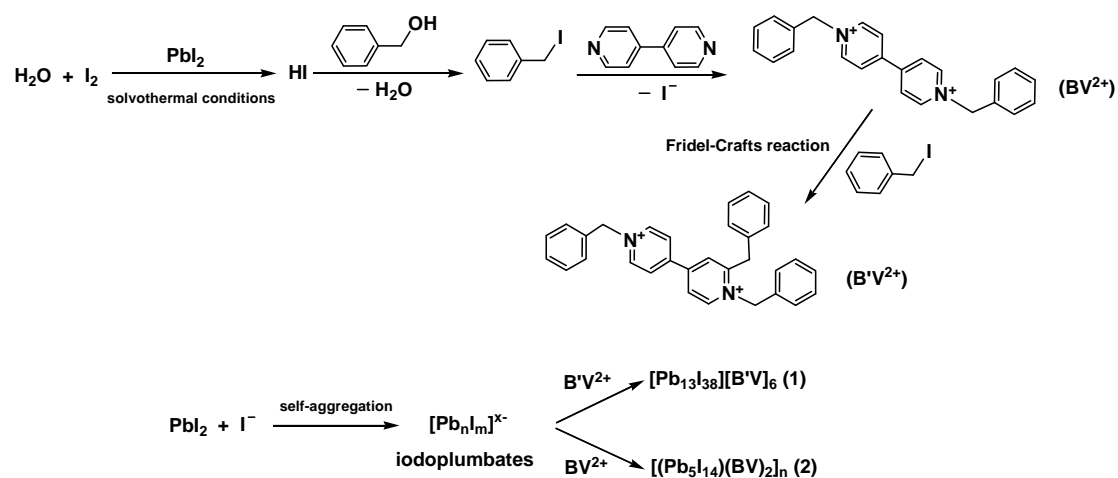

**Scheme S1.** The possible mechanisms for the formation of 1,1'-dibenzyl-4,4'-bipyridinium ( $\text{BV}^{2+}$ ), 1,2,1'-tribenzyl-4,4'-bipyridinium ( $\text{B}'\text{V}^{2+}$ ), and two low-dimensional viologen iodoplumbates ( $[\text{Pb}_{13}\text{I}_{38}][\text{B}'\text{V}]_6$  (**1**),  $[(\text{Pb}_5\text{I}_{14})(\text{BV})_2]_n$  (**2**)) through solvothermal reactions of benzyl alcohol with 4,4'-bipy,  $\text{PbI}_2$  and  $\text{I}_2$  along with a trace amount of water in acetonitrile.

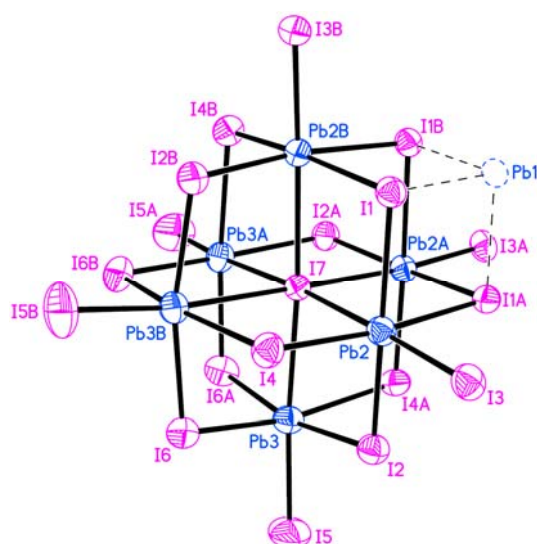

**Figure S1.** View of the  $[\text{Pb}_6\text{I}_{19}]$  fragment in the  $[\text{Pb}_{13}\text{I}_{38}]^{12-}$  anion of **1** with a labeling scheme and 50% thermal ellipsoids. Symmetry codes: A:  $-x + y + 1, -x + 1, z$ ; B:  $-y + 1, x - y, z$ .

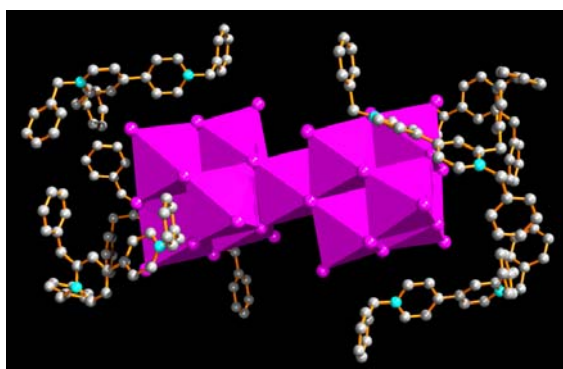

**Figure S2.** View of the  $[\text{Pb}_{13}\text{I}_{38}]^{12-}$  anion in **1**. Each pink octahedron represents a  $\text{PbI}_6$  unit. All H atoms have been omitted for clarity.

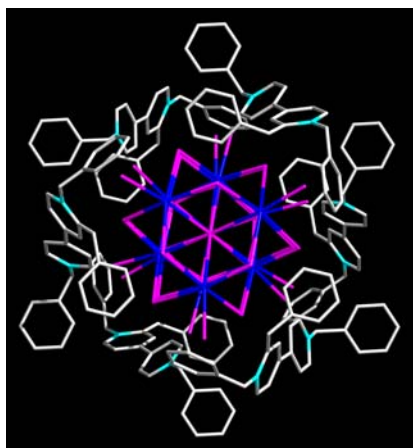

**Figure S3.** View of a Kagomé-like cavity of the molecular structure of **1** looking down along the  $c$

axis. All H atoms have been omitted for clarity.

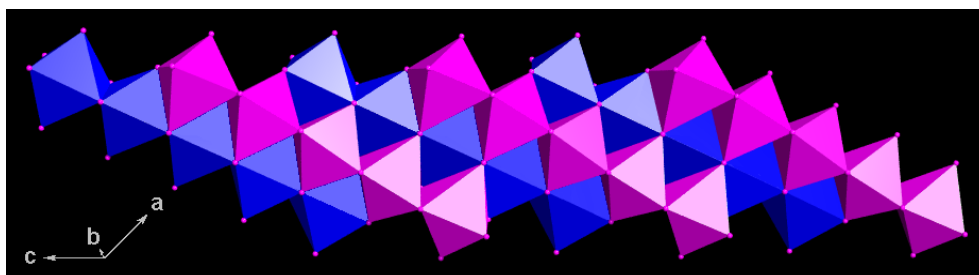

**Figure S4.** View of the double stranded iodoplumbate chain of **2**. Each octahedron represents a  $\text{PbI}_6$  unit.

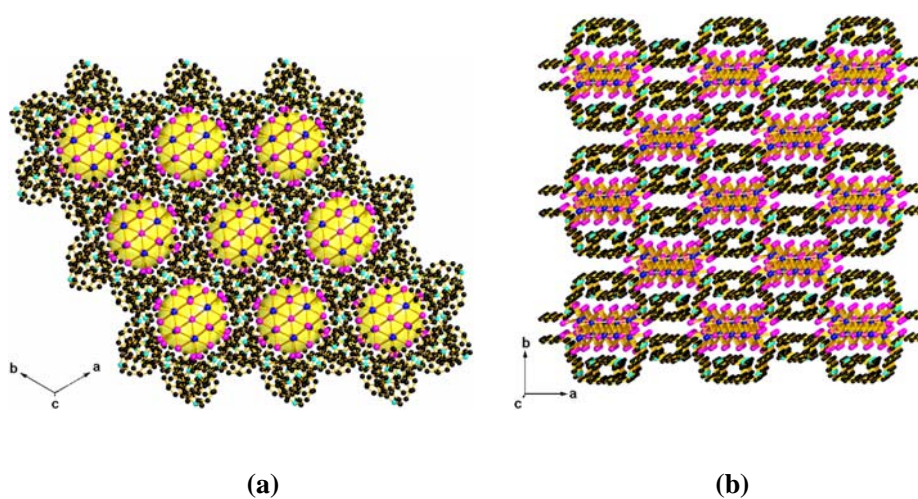

**Figure S5.** Views of the 3D packing diagram of **1** (a) and **2** (b) looking down along the  $c$ -direction. Each yellow ball in (a) represents one  $[\text{Pb}_{13}\text{I}_{38}]^{12-}$  anion in **1**. Atom color codes: C, black; N, cyan; Pb, blue; I, pink. All H atoms have been omitted for clarity.

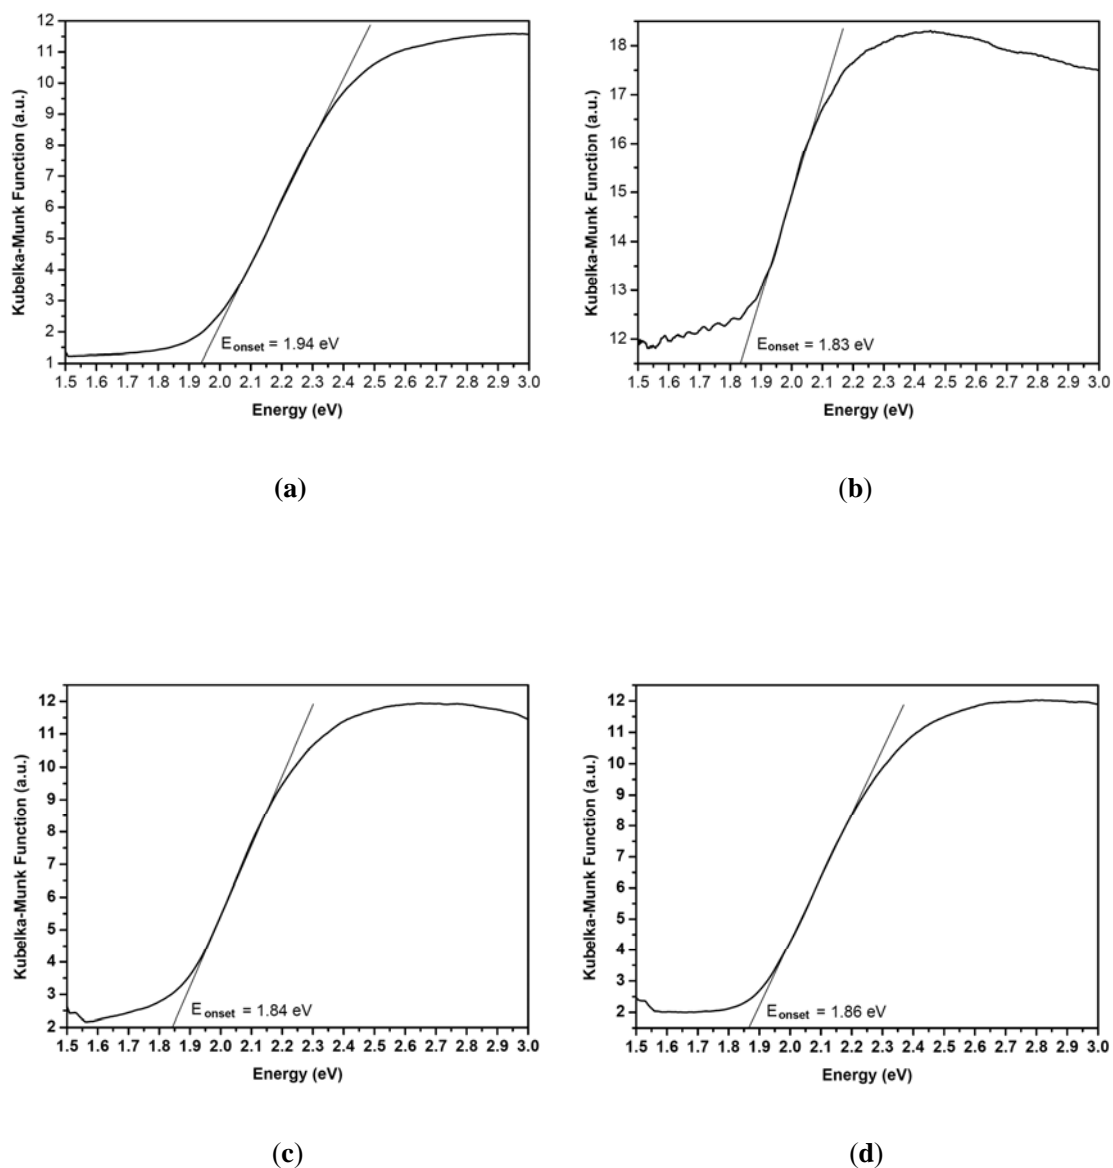

**Figure S6.** Solid-state optical diffuse-reflection spectra of **1** (a), **2** (b) along with two Zn/Cl-doped samples (**2a** (c), and **2b** (d)).

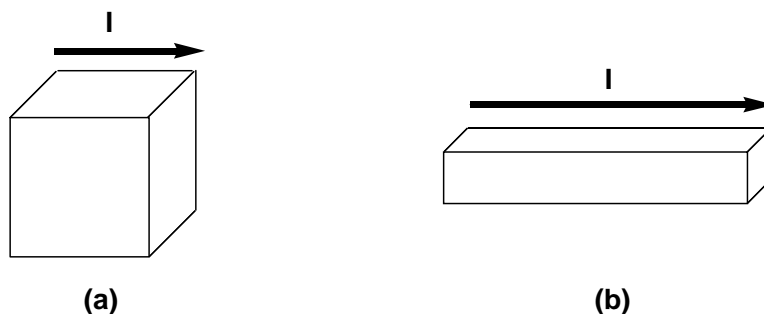

**Figure S7.** The flowing directions of current in single crystals of **1(a)**, **2(b)** along with two Zn/Cl-doped samples (**2a(b)** and **2b(b)**). For the electric conductivity measurements, the conductive adhesive was used to fix the two ends of a single crystal, which were further connected with two conducting probes. This device was put on a thermostatic stage, and the conductivity along the fixed direction was measured by using an Agilent 4156C semiconductor parameter analyzer and Vector MX-1100B Prober. For each compound, five single crystals were selected out to measure. In the case of **1**, ten crystals were chosen because of the uncertainty of the direction for cube crystal. The final data were the average of the records.

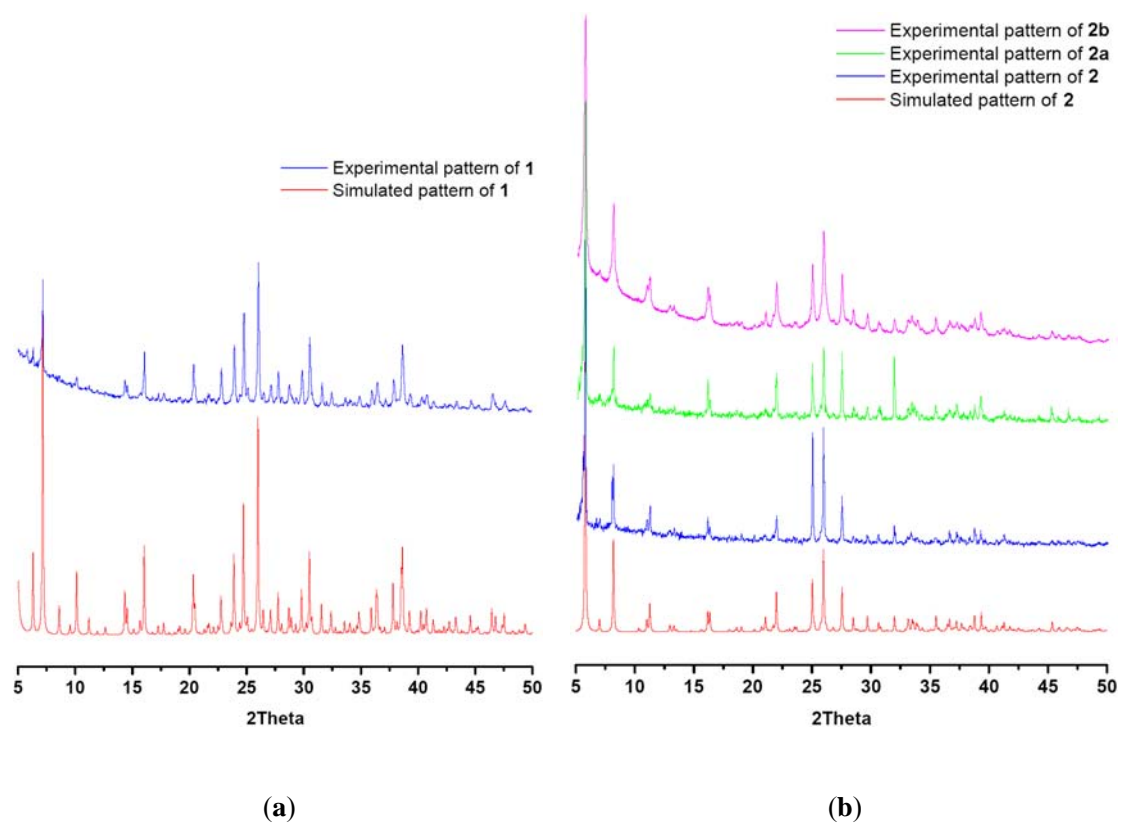

**Figure S8.** Powder X-ray diffraction (PXRD) spectra of **1**, **2** along with two Zn/Cl-doped samples (**2a** and **2b**). (a) Experimental (blue line) and simulated (red line) patterns of **1**. (b) Experimental (blue line) and simulated (red line) patterns of **2** and experimental patterns of **2a** (pink line) and **2b** (green line).

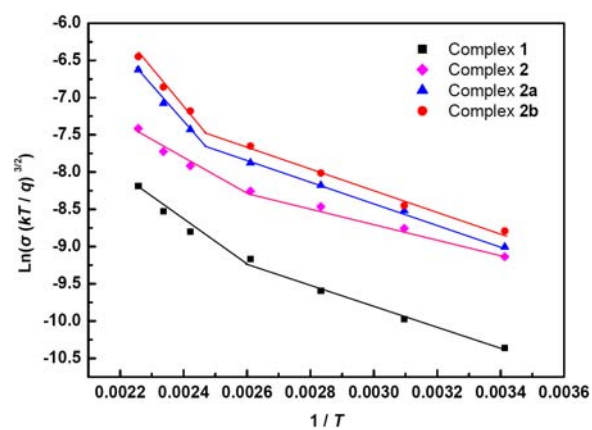

**Figure S9.** The plot of  $1/T$  and  $\text{Ln}(\sigma(kT/q)^{3/2})$  based on Holstein model for **1**, **2**, **2a** and **2b**.
